# Supplementary material
Source: PubMed Central journal article supplement (PMC7094664)

# Supplemental Figure S1

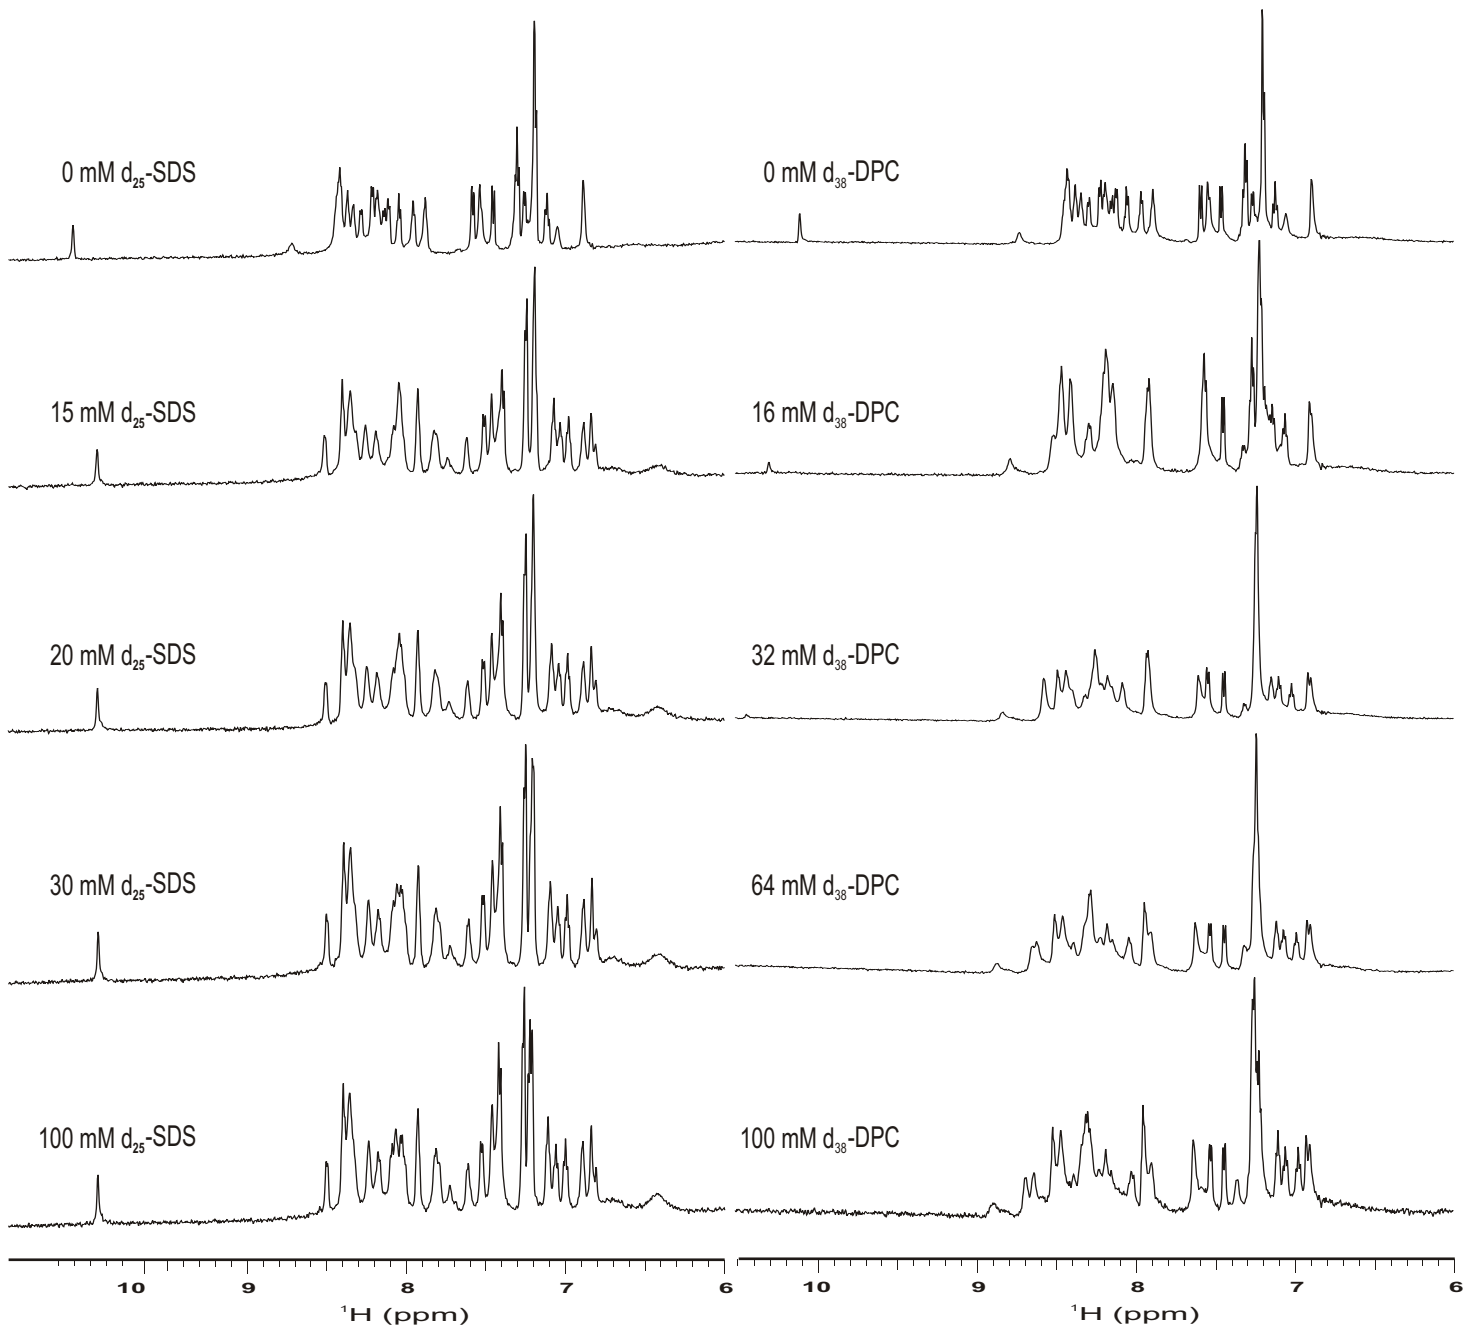

Supplement: mmc1.pdf [file mmc1.pdf]

Supplemental Figure S3

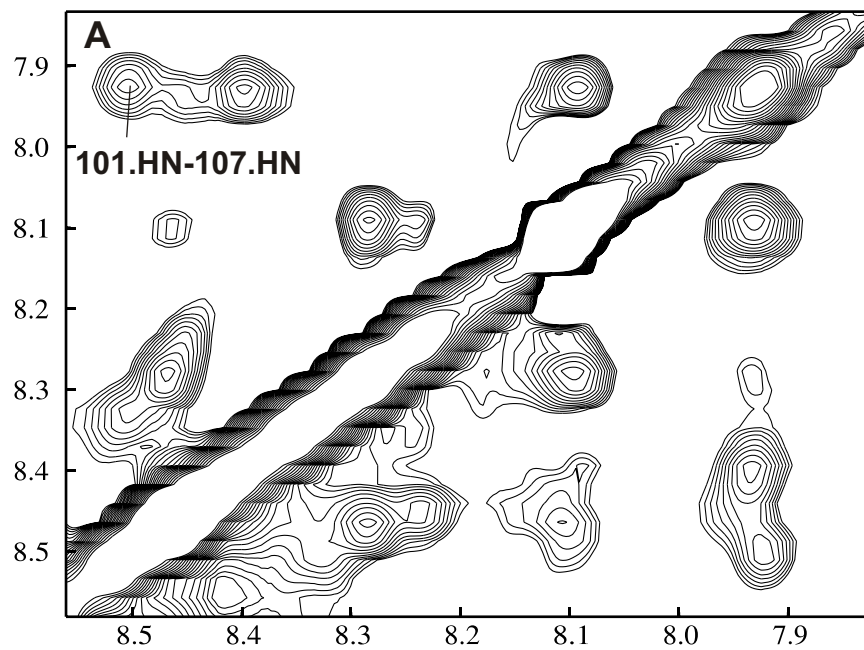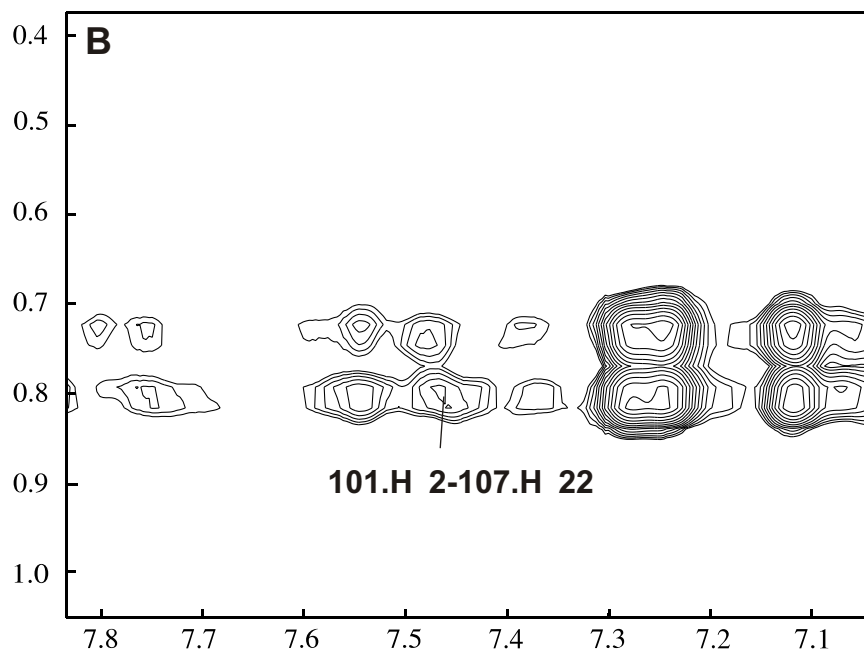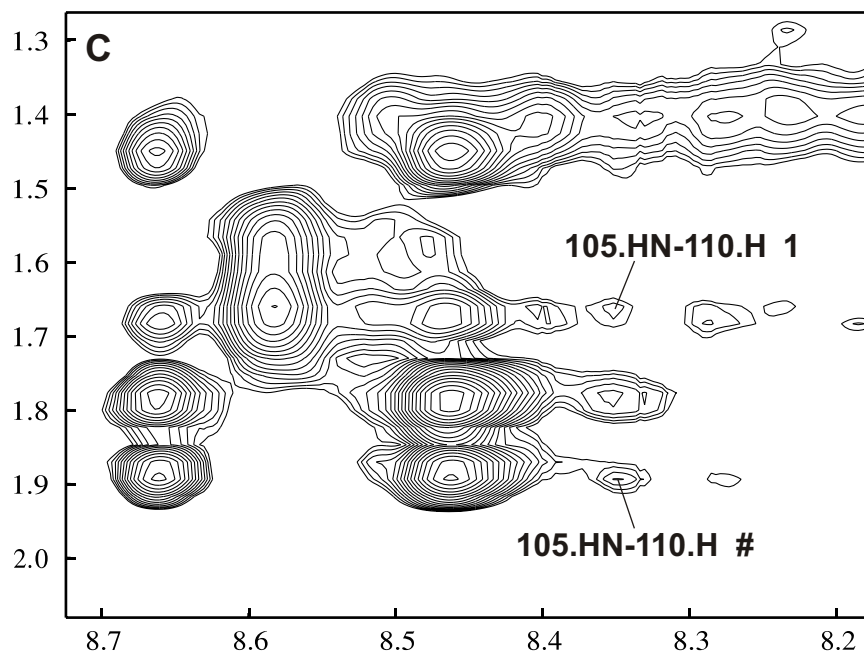

Supplement: mmc3.pdf [file mmc3.pdf]

Supplemental Figure S4

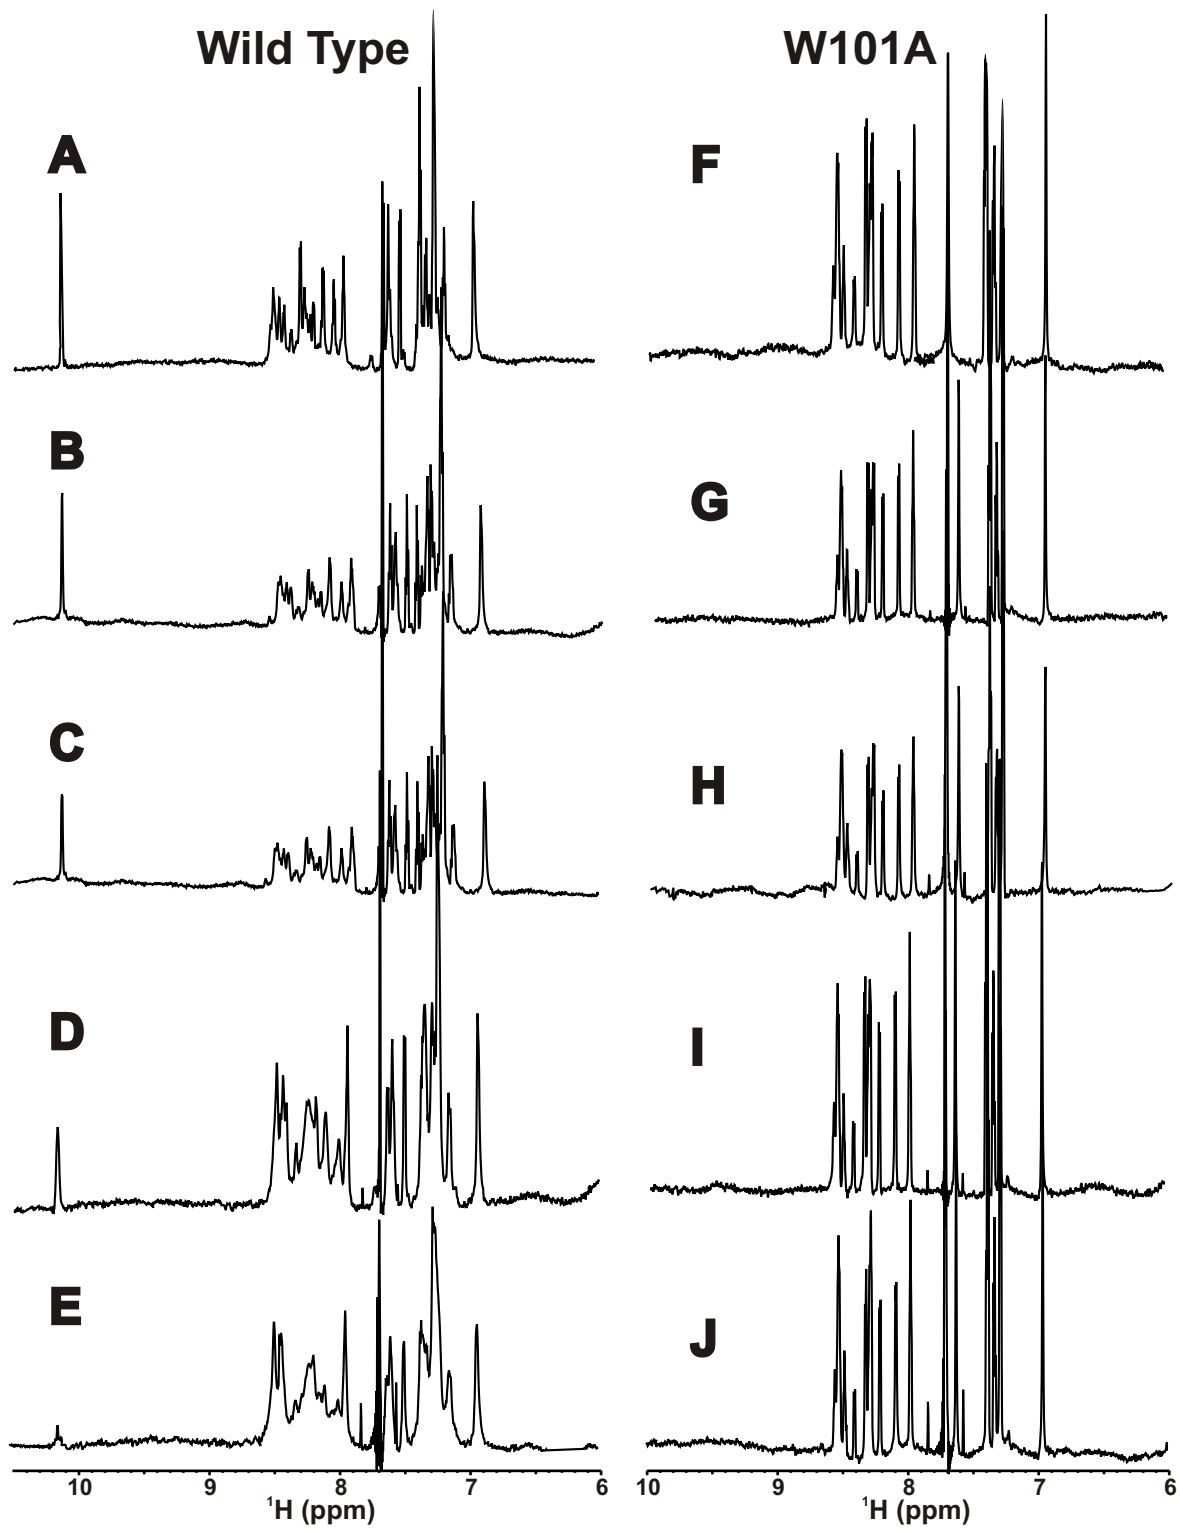

Supplement: mmc4.pdf [file mmc4.pdf]
